# Supplementary material for: On-Chip Electromembrane Surrounded Solid Phase Microextraction for Determination of Tricyclic Antidepressants from Biological Fluids Using Poly(3,4-ethylenedioxythiophene)—Graphene Oxide Nanocomposite as a Fiber Coating
Source: MDPI journal article supplement (doi:10.3390/bios13010139), 2023-01-14
Supplement: s1 [file s1]

## Supplementary Material

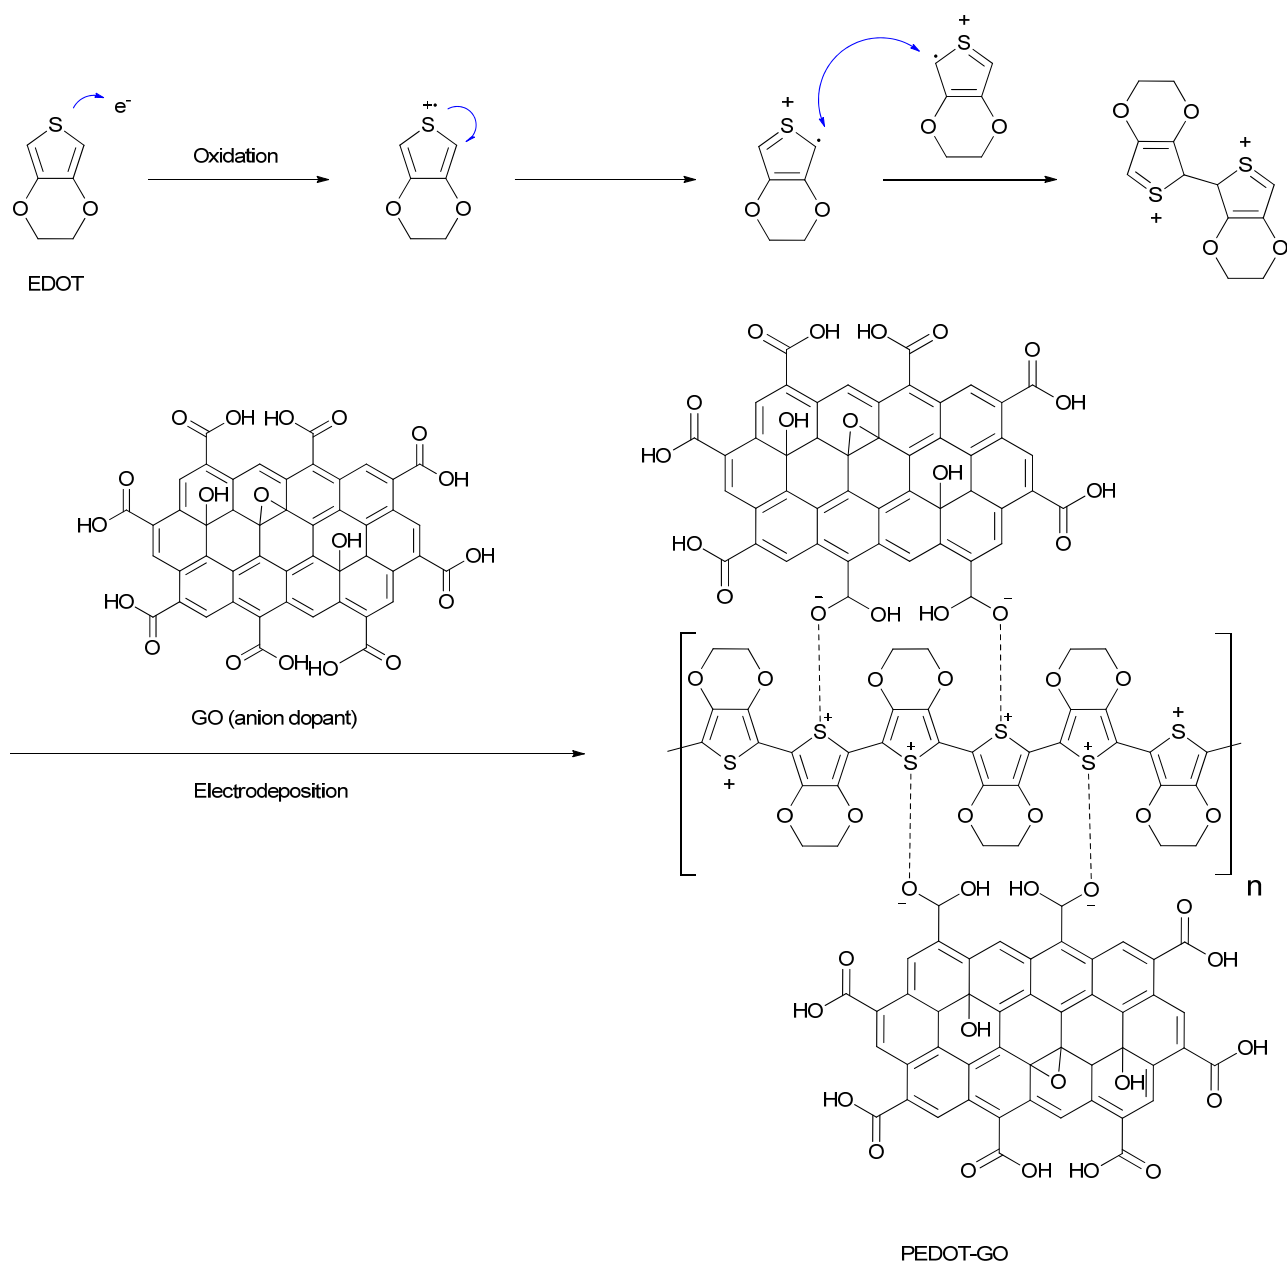

**Figure S1.** The structure and electrodeposition reaction of PEDOT-GO.

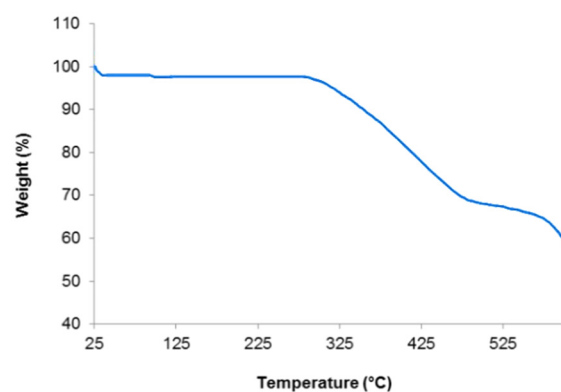

**Figure S2.** Thermogravimetric analysis of PEDOT-GO.

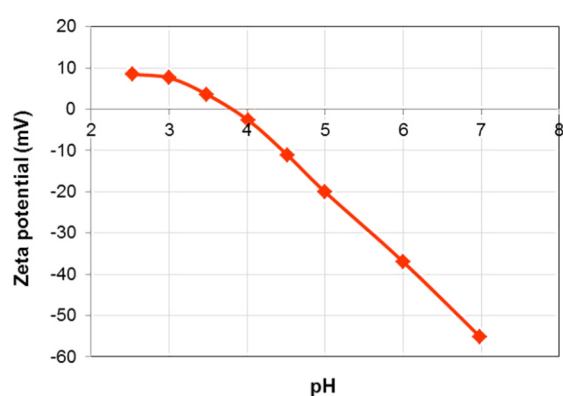

**Figure S3.** Zeta potential analysis of PEDOT-GO.

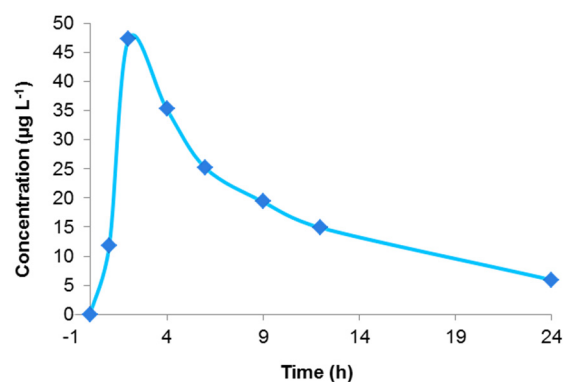

**Figure S4.** The concentration–time curve of founded imipramine in urine samples taken at different hours after consumption.

**Table S1.** Selected ions and retention times of TCAs employed in SIM mode of GC–MS.

| Analyte       | Quantifier<br>(m/z) | Qualifier<br>(m/z)  | Retention time<br>(t <sub>R</sub> , min) |
|---------------|---------------------|---------------------|------------------------------------------|
| Amitriptyline | 58.0                | 202.0, 215.0, 189.0 | 17.3                                     |
| Nortriptyline | 44.1                | 215.1, 202.1, 189.0 | 17.4                                     |
| Imipramine    | 234.0               | 85.0, 193.0, 130.0  | 17.5                                     |
| Desipramine   | 195.0               | 208.0, 234.0, 220.0 | 17.7                                     |
| Maprotiline   | 44.0                | 203.0, 59.0, 70.0   | 18.3                                     |
| Sertraline    | 274.0               | 262.0, 159.0, 304.0 | 18.5                                     |
